# Supplementary material for: High genetic burden of type 2 diabetes can promote the high prevalence of disease: a longitudinal cohort study in Iran
Source: PubMed Central journal article supplement (PMC7438483; doi:10.1038/s41598-020-70725-4), 2020-08-19
Supplement: 41598_2020_70725_MOESM4_ESM.pdf [file 41598_2020_70725_MOESM4_ESM.pdf]

High genetic burden of type 2 diabetes can promote the high prevalence of disease: A longitudinal cohort study in Iran

Maryam Moazzam-Jazi, Leila Najd Hassan Bonab, Asiyeh Sadat Zahedi, Maryam S. Daneshpour\*

This file includes the Supplementary Table 1. The other supplementary information is available as Excel format.

**Supplementary Table 1.** The association of PRS with fasting plasma glucose

| <b>Quintile</b> | <b><math>\beta</math> (SE)</b> | <b>p-value</b> |
|-----------------|--------------------------------|----------------|
| 2 (20–40%)      | 0.2 (0.1)                      | 0.63           |
| 3 (40–60%)      | 0.29 (0.12)                    | 0.5            |
| 4 (60–80%)      | 0.7 (0.3)                      | 0.09           |
| 5 (> 80%)       | 1.11 (0.32)                    | 0.01           |

Model is adjusted for age, sex, BMI, 2-hour plasma glucose, cholesterol, triglyceride, high density lipoprotein cholesterol, and low density lipoprotein cholesterol levels. The first quintile (< 20%) was considered as reference.
